# Supplementary material for: Structural change as a key component for agricultural non-CO2 mitigation efforts
Source: PubMed Central journal article supplement (PMC5849693; doi:10.1038/s41467-018-03489-1), 2018-03-13
Supplement: 41467_2018_3489_MOESM1_ESM.pdf [file 41467_2018_3489_MOESM1_ESM.pdf]

# Frank et al. Supplementary Material - Structural change as a key component for agricultural non-CO<sub>2</sub> mitigation efforts

## SUPPLEMENTARY FIGURES

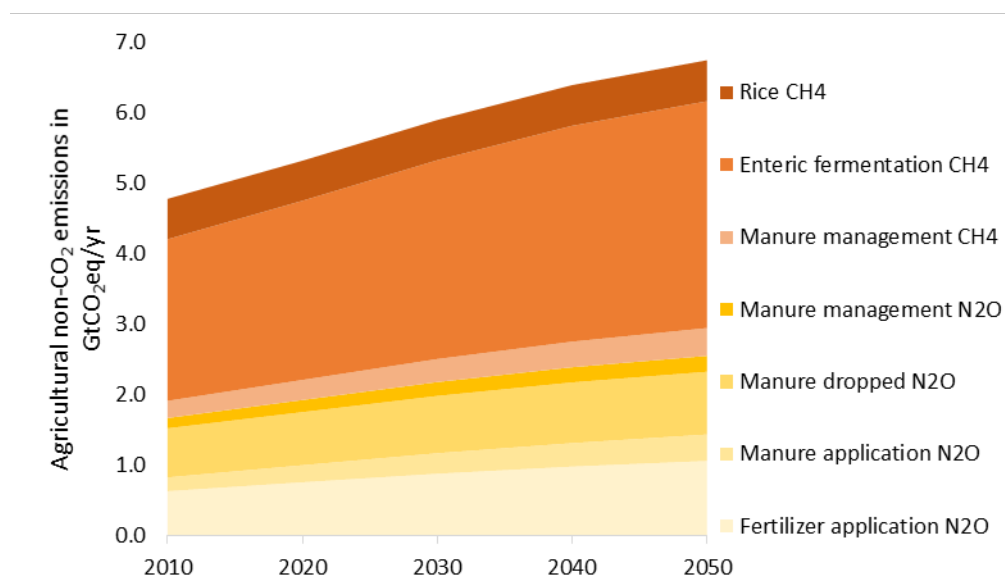

Supplementary Figure 1. Development of agricultural non-CO<sub>2</sub> emissions in the baseline scenario by GHG source.

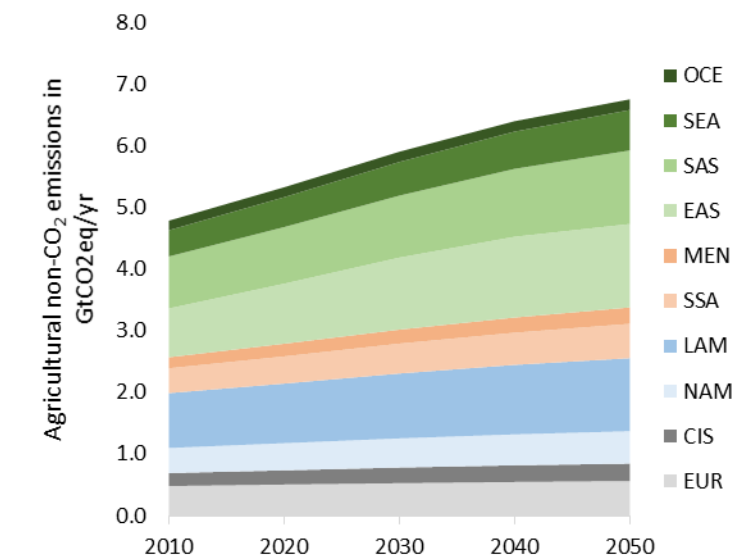

Supplementary Figure 2. Development of agricultural non-CO<sub>2</sub> emissions in the baseline scenario by region.

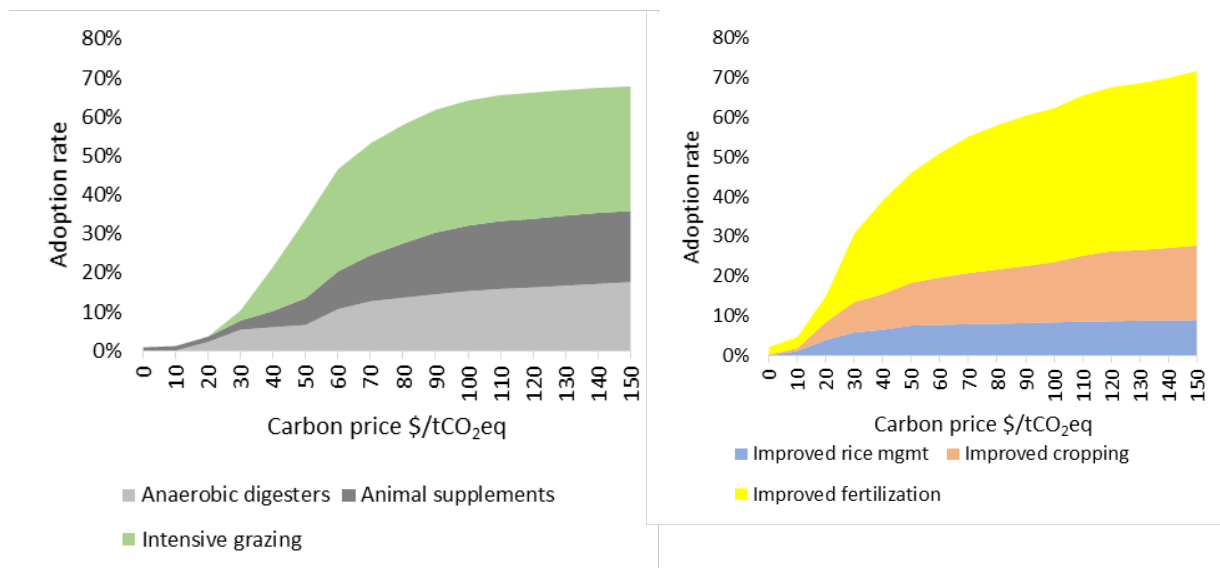

Supplementary Figure 3. Adoption rate of technical crop- and livestock mitigation options across carbon price scenarios in 2050.

## SUPPLEMENTARY TABLES

Supplementary Table 1. Global average GHG reduction, impact on productivities and costs for technical mitigation options. Ranges across regions are presented in brackets.

| Mitigation option                            | Non-CO <sub>2</sub> reduction | Productivity changes | Annual costs            |
|----------------------------------------------|-------------------------------|----------------------|-------------------------|
| <i>Antibiotics<sup>a</sup></i>               | -2 (-6 to 0)%                 | +5%                  | 6 (5 to 10) \$/TLU      |
| <i>Bovine somatotropin (bST)<sup>b</sup></i> | +5 (0 to +10)%                | +12 (11 – 13)%       | 110 (100 to 240) \$/TLU |
| <i>Propionate precursors</i>                 | -13 (-10 to -19)%             | +5%                  | 41 (35 to 60) \$/TLU    |
| <i>Anti-methanogen vaccination</i>           | -10 %                         | +5%                  | 9 (5 to 20) \$/TLU      |
| <i>Intensive grazing</i>                     | -14 (-13 to -15)%             | -11%                 | 6 (5 to 20) \$/TLU      |
| <i>Large-scale complete-mix digesters</i>    | -85%                          | -                    | 25 (5 to 55) \$/TLU     |

|                                                                                                                |                    |                    |                      |
|----------------------------------------------------------------------------------------------------------------|--------------------|--------------------|----------------------|
| <i>Large-scale covered lagoon</i>                                                                              | -85%               | -                  | 34 (10 to 70) \$/TLU |
| <i>Large-scale fixed-film digester</i>                                                                         | -85%               | -                  | 34 (10 to 60) \$/TLU |
| <i>Large-scale plug-flow digesters</i>                                                                         | -85%               | -                  | 38 (10 to 75) \$/TLU |
| <i>Small-scale digester</i>                                                                                    | -50%               | -                  | 7 (5 to 15) \$/TLU   |
| <i>Centralized digester<sup>c</sup></i>                                                                        | -90%               | -                  | 8 (5 – 45) \$/TLU    |
| <i>No-till adoption</i>                                                                                        | -13 (-2 to -22)%   | -6 (-22 to +1)%    | -23 (-85 to 0) \$/ha |
| <i>Optimal N fertilization</i>                                                                                 | +47 (-75 to +290)% | +167 (+1 to +775)% | 16 (10 to 15) \$/ha  |
| <i>Split N fertilization</i>                                                                                   | -3 (-11 to +1)%    | +3 (0 to +29)%     | 1 \$/ha              |
| <i>Nitrification inhibitors</i>                                                                                | -7 (-2 to -23)%    | +0.2 (-9 to +9)%   | 23 (15 to 35) \$/ha  |
| <i>100% residue incorporation</i>                                                                              | +26 (+4 to +52)%   | +5 (0 to +21)%     | 5 (0 to 30) \$/ha    |
| <i>Improved rice management: various combinations of different water-, residue-, and fertilizer management</i> | -100% to +300%     | -33% to +47%       | -16 to 123 \$/ha     |

TLU: livestock unit, an animal of 250 kg live weight. <sup>a</sup> Antibiotics: No application in Europe and Taiwan (Maron et al., 2013); <sup>b</sup> bST: No application in Australia, Canada, Europe, Japan, New Zealand (Dervilly-Pinel et al., 2014); <sup>c</sup> Centralized digesters are only applied in Europe;

## SUPPLEMENTARY REFERENCES

- Dervilly-Pinel, G., S. Prévost, F. Monteau and B. Le Bizec (2014). "Analytical strategies to detect use of recombinant bovine somatotropin in food-producing animals." TrAC Trends in Analytical Chemistry **53**(0): 1-10.
- Maron, D., T. Smith and K. Nachman (2013). "Restrictions on antimicrobial use in food animal production: an international regulatory and economic survey." Globalization and Health **9**(1): 48.
